# Supplementary material for: Identification and Characterization of Rice OsHKT1;3 Variants
Source: MDPI journal article supplement (doi:10.3390/plants10102006), 2021-09-24
Supplement: s1 [file s1]

# Supplementary materials for

*Article*

## Identification and characterization of rice *OsHKT1;3* variants

Shahin Imran <sup>1,2</sup>, Yoshiyuki Tsuchiya <sup>1</sup>, Sen Thi Huong Tran <sup>1,3</sup>, and Maki Katsuhara <sup>1,\*</sup>

<sup>1</sup> Institute of Plant Science and Resources, Okayama University, 2-20-1 Chuo, Kurashiki 710-0046, Japan; ptj87a5q@s.okayama-u.ac.jp & shahin.imran@kau.edu.bd (S.I.); y-tsuchi@okayama-u.ac.jp (Y.T.); pota42or@s.okayama-u.ac.jp (S.T.H.T.); kmaki@okayama-u.ac.jp (M.K.)

<sup>2</sup> Department of Agronomy, Khulna Agricultural University, Khulna-9100, Bangladesh

<sup>3</sup> Faculty of Agronomy, University of Agriculture and Forestry, Hue University, Hue 530000, Vietnam

\* Correspondence: kmaki@okayama-u.ac.jp; Tel.: +81-086-434-1221; Fax: +81-086-434-1249

**Supplementary Table S1.** Gene-specific primer pairs used for the cloning and in the real-time PCR experiments

|             |         | For full-length      | For RT-PCR and real-time RT-PCR |
|-------------|---------|----------------------|---------------------------------|
| OsHKT1;3    | Forward | TGCAAATAAGGAAGCACCCA |                                 |
|             | Reverse | AGGTGGAAGATGCATGGCTT |                                 |
| OsHKT1;3_FL | Forward |                      | AGTCAGCACAAGGGATCACTCAC         |
|             | Reverse |                      | AGAAGATATCCCATCACTAC            |
| OsHKT1;3_V1 | Forward |                      | GCGCTCAACTCTGGGTTTTGACTATTT     |
|             | Reverse |                      | GATAGTTGCTCATTCCATCCA           |
| OsHKT1;3_V2 | Forward |                      | TCCTCTCTTTGGAGTGGAGCT           |
|             | Reverse |                      | GTCCCGTTCATCATGTCTGGGT          |
| OsHKT1;3_V3 | Forward |                      | TGCTGATTGGTGGTATCTCCCTGGTTG     |
|             | Reverse |                      | AACCGAGAACCCCACATTTCC           |
| OsHKT1;3_V4 | Forward |                      | CTTCGTTTTTTACCCAGACATGATG       |
|             | Reverse |                      | TGCTGATTGGTGGTATCTCCCTGGTTG     |
| OsHKT1;3_V5 | Forward |                      | ATTGGTGGTGAGGTATCTCCCTGGTTA     |
|             | Reverse |                      | TGCTGATTGGTGGTATCTCCCTGGTTG     |

## Supplementary Table S2: R<sup>2</sup> values of all TEVC data

**Supplementary Table S2.1.** R<sup>2</sup> values of Oocytes injected with OsHKT1;3\_FL and its variants (V1-V5) or water measured in 96 mM Na<sup>+</sup> solution

| Oocytes injected cRNAs or water measured in NaCl | R <sup>2</sup> values for Figure 4A, B |
|--------------------------------------------------|----------------------------------------|
| OsHKT1;3_FL                                      | 0.9987                                 |
| OsHKT1;3_V1                                      | 0.9981                                 |
| OsHKT1;3_V2                                      | 0.9975                                 |
| OsHKT1;3_V3                                      | 1.0000                                 |
| OsHKT1;3_V4                                      | 0.9998                                 |
| OsHKT1;3_V5                                      | 0.9998                                 |
| Water                                            | 0.9971                                 |

**Supplementary Table S2.2.** R<sup>2</sup> values of Oocytes injected with OsHKT1;3\_FL measured in 86.4 mM Na-Glu +9.6 mM NaCl and 86.4 mM choline-Cl +9.6 mM NaCl

| Oocytes injected with OsHKT1;3_FL measured in | R <sup>2</sup> values for Figure 4C |
|-----------------------------------------------|-------------------------------------|
| 86.4 mM Na-Glu +9.6 mM NaCl                   | 0.9940                              |
| 86.4 mM choline-Cl +9.6 mM NaCl               | 0.9956                              |

**Supplementary Table S2.3.** R<sup>2</sup> values of Oocytes injected with OsHKT1;3\_FL and its variants (V1-V5) or water measured in 96 mM K<sup>+</sup> solution

| Oocytes injected cRNAs or water measured in KCl | R <sup>2</sup> values for Supplementary Figure S5 |
|-------------------------------------------------|---------------------------------------------------|
| OsHKT1;3_FL                                     | 0.9926                                            |
| OsHKT1;3_V1                                     | 0.9927                                            |
| OsHKT1;3_V2                                     | 0.9934                                            |
| OsHKT1;3_V3                                     | 0.9931                                            |
| OsHKT1;3_V4                                     | 0.9933                                            |
| OsHKT1;3_V5                                     | 0.9901                                            |
| Water                                           | 0.9940                                            |

**Supplementary Table S2.4.** R<sup>2</sup> values of Oocytes injected with water measured in 86.4 mM Na-Glu +9.6 mM NaCl and 86.4 mM choline-Cl +9.6 mM NaCl

| Oocytes injected with water measured in | R <sup>2</sup> values for Supplementary Figure S6 |
|-----------------------------------------|---------------------------------------------------|
| 86.4 mM Na-Glu +9.6 mM NaCl             | 0.9948                                            |
| 86.4 mM choline-Cl +9.6 mM NaCl         | 0.9932                                            |

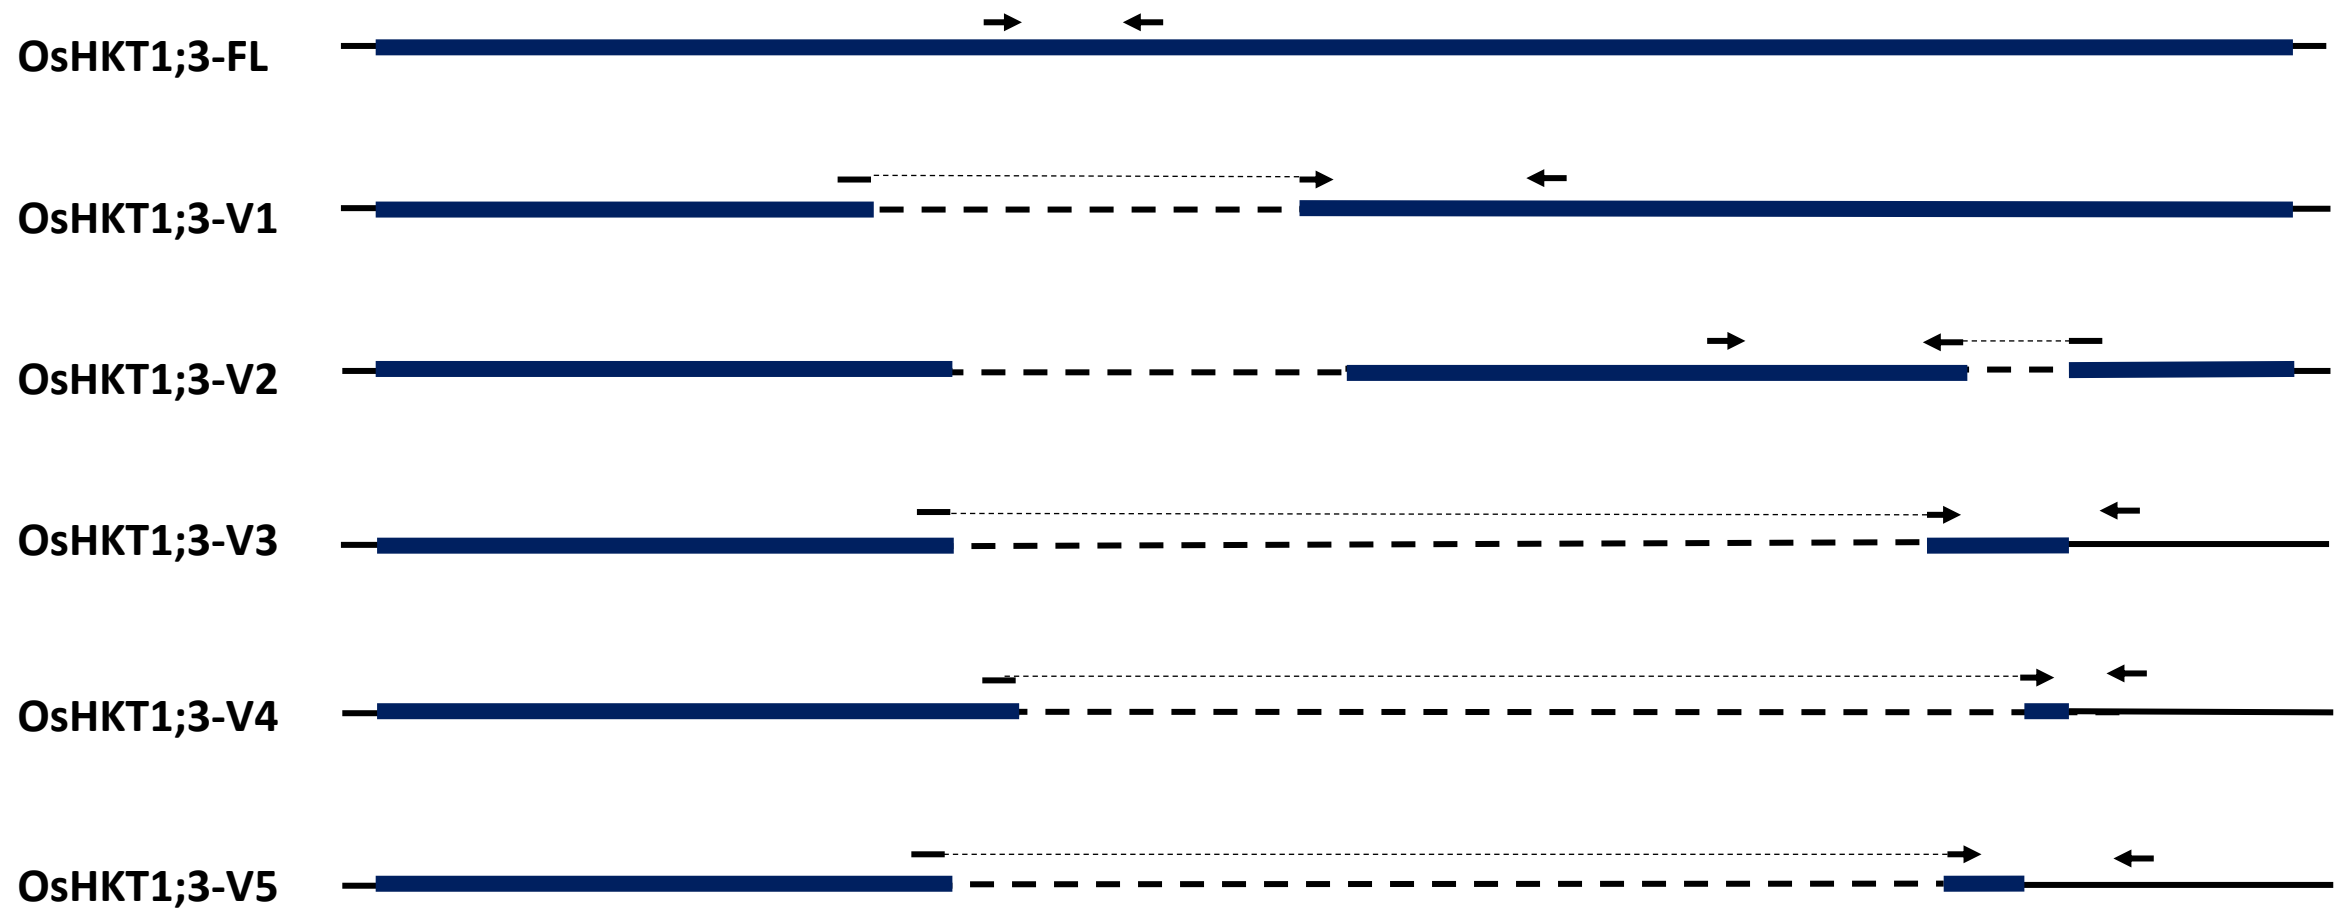

**Supplementary Figure S1.**

Specific primer position of *OsHKT1;3*\_FL and its five variant for qPCR assays. Right arrows indicate forward primers, and left arrows indicate reverse primers.

|                      |      |                                                                 |      |
|----------------------|------|-----------------------------------------------------------------|------|
| OsHKT1;3 Genomic DNA | 1    | CGGGGCCCCCTCGAGGTCGACGGTATCGATAAGCTTGCTTGTTCTTTTGCAGAAGCTC      | 60   |
| OsHKT1;3_FL          | 1    | --GGGCCCCCTCGAGGTCGACGGTATCGATAAGCTTGCTTGTTCTTTTGCAGAAGCTC      | 58   |
| OsHKT1;3 Genomic DNA | 61   | AGAATAAACGCTCAACTTTGGCAGAACCATGAATCATTTGTCTTGTAGTATCCACAAAAA    | 120  |
| OsHKT1;3_FL          | 59   | AGAATAAACGCTCAACTTTGGCAGAACCATGAATCATTTGTCTTGTAGTATCCACAAAAA    | 118  |
| OsHKT1;3 Genomic DNA | 121  | ACTCCAAACTTTCCGCACATTGCGAGTAGCAAGTTCTCTTCTTTTACCAAAATCTGCACA    | 180  |
| OsHKT1;3_FL          | 119  | ACTCCAAACTTTCCGCACATTGCGAGTAGCAAGTTCTCTTCTTTTACCAAAATCTGCACA    | 178  |
| OsHKT1;3 Genomic DNA | 181  | GAAGTCTATAAAATACTCCTTCCAGTTCATCTACCAAAACAAATCCACTCTTTGTCCATGT   | 240  |
| OsHKT1;3_FL          | 179  | GAAGTCTATAAAATACTCCTTCCAGTTCATCTACCAAAACAAATCCACTCTTTGTCCATGT   | 238  |
| OsHKT1;3 Genomic DNA | 241  | AGCTTACTTTGCCCTGATCTCCTTTGCTGGATATGGATCTCTAAAGGTCCTCAAGCCACG    | 300  |
| OsHKT1;3_FL          | 239  | AGCTTACTTTGCCCTGATCTCCTTTGCTGGATATGGATCTCTAAAGGTCCTCAAGCCACG    | 298  |
| OsHKT1;3 Genomic DNA | 301  | AGACAAGTCAAATACTCTGAAAGACTTGGACGTGCTATTTACTTCCGTATCTGCATCAAC    | 360  |
| OsHKT1;3_FL          | 299  | AGACAAGTCAAATACTCTGAAAGACTTGGACGTGCTATTTACTTCCGTATCTGCATCAAC    | 358  |
| OsHKT1;3 Genomic DNA | 361  | TGTTTCAAGCATGGCTACTGTGTGAAATGGAGGATTTCTCAAGCGCTCAACTCTGGGTTTT   | 420  |
| OsHKT1;3_FL          | 359  | TGTTTCAAGCATGGCTACTGTGTGAAATGGAGGATTTCTCAAGCGCTCAACTCTGGGTTTT   | 418  |
| OsHKT1;3 Genomic DNA | 421  | GACTATTTTAAATGCTGATTGGTGGTGAGGTATTCACCTCAATGCTTGGCATTCACTTTAT   | 480  |
| OsHKT1;3_FL          | 419  | GACTATTTTAAATGCTGATTGGTGGTGAGGTATTCACCTCAATGCTTGGCATTCACTTTAT   | 478  |
| OsHKT1;3 Genomic DNA | 481  | GAGAGCCGAATTTGGTACAAAAGAGTCAGTCAGCACAAAGGGATCACTCACCTTGCATTGA   | 540  |
| OsHKT1;3_FL          | 479  | GAGAGCCGAATTTGGTACAAAAGAGTCAGTCAGCACAAAGGGATCACTCACCTTGCATTGA   | 538  |
| OsHKT1;3 Genomic DNA | 541  | TATTGAGTCTATTACTTCCACAAAATTTGGTCCCAGCACCCAGGGCACAAAAGTTACAGT    | 600  |
| OsHKT1;3_FL          | 539  | TATTGAGTCTATTACTTCCACAAAATTTGGTCCCAGCACCCAGGGCACAAAAGTTACAGT    | 598  |
| OsHKT1;3 Genomic DNA | 601  | TTCATTTTCTGAACTCCGCATGGAAAATGGAGGACATGTAGAGCCCAAGACGATTAAATT    | 660  |
| OsHKT1;3_FL          | 599  | TTCATTTTCTGAACTCCGCATGGAAAATGGAGGACATGTAGAGCCCAAGACGATTAAATT    | 658  |
| OsHKT1;3 Genomic DNA | 661  | TTTAGGTTTTGTAGTGTATGGGATATCTTCTAATAACAAACTTAGGCGGCTCCCTACTTAT   | 720  |
| OsHKT1;3_FL          | 659  | TTTAGGTTTTGTAGTGTATGGGATATCTTCTAATAACAAACTTAGGCGGCTCCCTACTTAT   | 718  |
| OsHKT1;3 Genomic DNA | 721  | TTACCTCTACCTTAACCTGGTACCAAGTGCACATAAAATTCTAAAGAGAAAAGGCATTGG    | 780  |
| OsHKT1;3_FL          | 719  | TTACCTCTACCTTAACCTGGTACCAAGTGCACATAAAATTCTAAAGAGAAAAGGCATTGG    | 778  |
| OsHKT1;3 Genomic DNA | 781  | GATCATCGTATTCTCAGTATTTACAGCCATCTCCTCAGTTGGAAATTGTGGCTTCACCTCC   | 840  |
| OsHKT1;3_FL          | 779  | GATCATCGTATTCTCAGTATTTACAGCCATCTCCTCAGTTGGAAATTGTGGCTTCACCTCC   | 838  |
| OsHKT1;3 Genomic DNA | 841  | AGTAAATGAGAATATGATTATCTTTCAGAAGAACTCCATTCTTCTATTGCTAATTCCTCC    | 900  |
| OsHKT1;3_FL          | 839  | AGTAAATGAGAATATGATTATCTTTCAGAAGAACTCCATTCTTCTATTGCTAATTCCTCC    | 898  |
| OsHKT1;3 Genomic DNA | 901  | TCAGATACTAGCAGGAAATACATTATTTGCACCATGCTTGAGATTAATGGTGTGGTCACT    | 960  |
| OsHKT1;3_FL          | 899  | TCAGATACTAGCAGGAAATACATTATTTGCACCATGCTTGAGATTAATGGTGTGGTCACT    | 958  |
| OsHKT1;3 Genomic DNA | 961  | TGAGAAGATTACCGGAAAAAAGGATTGTCTGTACATTCTTGAATATCCAAAGGCCATTGG    | 1020 |
| OsHKT1;3_FL          | 959  | TGAGAAGATTACCGGAAAAAAGGATTGTCTGTACATTCTTGAATATCCAAAGGCCATTGG    | 1018 |
| OsHKT1;3 Genomic DNA | 1021 | ATATAAACATCTTATGAGTACCAAGGGAAGTGTTTATTTGACTTTAACAGTTGTGAGCTT    | 1080 |
| OsHKT1;3_FL          | 1019 | ATATAAACATCTTATGAGTACCAAGGGAAGTGTTTATTTGACTTTAACAGTTGTGAGCTT    | 1078 |
| OsHKT1;3 Genomic DNA | 1081 | GATCATTCTGC AAAACCGTATTGTTCCCTCTCTTTGGAGTGGAGCTCGGTAGCTTTGGATGG | 1140 |
| OsHKT1;3_FL          | 1079 | GATCATTCTGC AAAACCGTATTGTTCCCTCTCTTTGGAGTGGAGCTCGGTAGCTTTGGATGG | 1138 |
| OsHKT1;3 Genomic DNA | 1141 | AATGAGCAACTATCAAAAGATAGTATCCGCTCTATTTCAGTCGGTCAATGCTAGGCATGC    | 1200 |
| OsHKT1;3_FL          | 1139 | AATGAGCAACTATCAAAAGATAGTATCCGCTCTATTTCAGTCGGTCAATGCTAGGCATGC    | 1198 |
| OsHKT1;3 Genomic DNA | 1201 | AGGTGAATCTGTTACAGATCTGTCAAACCTCTCTTCAGCAATCCTAGTCCATACACCAT     | 1260 |
| OsHKT1;3_FL          | 1199 | AGGTGAATCTGTTACAGATCTGTCAAACCTCTCTTCAGCAATCCTAGTCCATACACCAT     | 1258 |
| OsHKT1;3 Genomic DNA | 1261 | CATGATGTAAGTCCCTTCTCAAACCTTCTCCCCAAAATAAGAATGATCATAAGTAAGAAA    | 1320 |
| OsHKT1;3_FL          | 1259 | CATGATGTATCTCCCTGGTTACAC-TTC-----                               | 1285 |
| OsHKT1;3 Genomic DNA | 1321 | ACTTCCTGTATTTATTGCTCTAGTCAGTAACTATATAAATTTAACTACCTTATCATGGAC    | 1380 |
| OsHKT1;3_FL          | 1285 | -----                                                           | 1285 |
| OsHKT1;3 Genomic DNA | 1381 | ATCACATTTGCCTTCCTTCACTTATAATAGCCCTATAGTGGTTCTCTCGAATATGTGCAG    | 1440 |
| OsHKT1;3_FL          | 1285 | -----                                                           | 1285 |
| OsHKT1;3 Genomic DNA | 1441 | CAACGTTCAAAATATATTGTACTTCACCTAATAGGTAGGTTGCATATAGTAGAATGGAACAT  | 1500 |
| OsHKT1;3_FL          | 1285 | -----                                                           | 1285 |
| OsHKT1;3 Genomic DNA | 1501 | AAGGACATCAGATAATCTTTAAGAAATACACAGGAAAGCTTCCTACCATAGTACTCCTACC   | 1560 |
| OsHKT1;3_FL          | 1285 | -----                                                           | 1285 |
| OsHKT1;3 Genomic DNA | 1561 | TATTAAGAAAAGGAATTTTTTAATCACACAATCCCACAAGCCAGACTCAGTGCTAGATTTG   | 1620 |
| OsHKT1;3_FL          | 1285 | -----                                                           | 1285 |
| OsHKT1;3 Genomic DNA | 1621 | GTTGAGGACTATAGTAGTTCAAGAACCACCTTACAGGCTCAACAGTATACTACATACAAAG   | 1680 |
| OsHKT1;3_FL          | 1285 | -----                                                           | 1285 |
| OsHKT1;3 Genomic DNA | 1681 | CAGTTAGTCCAGTATATGTTATCATTGAGAGGAATTGTTCTTAATATGTAATCTTAACAC    | 1740 |
| OsHKT1;3_FL          | 1285 | -----                                                           | 1285 |
| OsHKT1;3 Genomic DNA | 1741 | ATACTTTGACTAATTTTTATGTAGGTATCTCCCTGGTTACACTTCGTTTTTACCCAGACA    | 1800 |
| OsHKT1;3_FL          | 1286 | -----GTTTTTACCCAGACA                                            | 1300 |
| OsHKT1;3 Genomic DNA | 1801 | TGATGGTGAGGATTCTAAGACCGAGAAGATAAACAAAAGAAAAGGGCTATTGGAGAACTG    | 1860 |
| OsHKT1;3_FL          | 1301 | TGATGGTGAGGATTCTAAGACCGAGAAGATAAACAAAAGAAAAGGGCTATTGGAGAACTG    | 1360 |
| OsHKT1;3 Genomic DNA | 1861 | GATCTTCTCACATATGTCCTTATTTGGCTATCTTTGTAATGCTAATTTGCATCACAGAACG   | 1920 |
| OsHKT1;3_FL          | 1361 | GATCTTCTCACATATGTCCTTATTTGGCTATCTTTGTAATGCTAATTTGCATCACAGAACG   | 1420 |
| OsHKT1;3 Genomic DNA | 1921 | GGACTCGATGGCTACAGATCCACTTAATTTCAATGTTTTTCAGCATATTGTTTGAAGTCGT   | 1980 |
| OsHKT1;3_FL          | 1421 | GGACTCGATGGCTACAGATCCACTTAATTTCAATGTTTTTCAGCATATTGTTTGAAGTCGT   | 1480 |
| OsHKT1;3 Genomic DNA | 1981 | CAGGCAAGCCACTGAAATTCACTGCATTCTGCAGAAAGCTCATGATTATTTTTTAACATG    | 2040 |
| OsHKT1;3_FL          | 1480 | -----                                                           | 1480 |
| OsHKT1;3 Genomic DNA | 2041 | AGTATCATCACTGAACATCTGGCTCTGATTGTTGCAGTGCATATGGAAATGTGGGGTTCT    | 2100 |
| OsHKT1;3_FL          | 1481 | -----CAGTGCATATGGAAATGTGGGGTTCT                                 | 1506 |
| OsHKT1;3 Genomic DNA | 2101 | CGGTTGGCTACAGCTGCAAGAGGCTACTGAACCATGATGCACGCTGCAAGGATGCCTCGT    | 2160 |
| OsHKT1;3_FL          | 1507 | CGGTTGGCTACAGCTGCAAGAGGCTACTGAACCATGATGCACGCTGCAAGGATGCCTCGT    | 1566 |
| OsHKT1;3 Genomic DNA | 2161 | ACGGGTTTGC GGGGAAATGGAGCGACAAATGGGAAAGCGATCCTGATCATCGTCATGCTTT  | 2220 |
| OsHKT1;3_FL          | 1567 | ACGGGTTTGC GGGGAAATGGAGCGACAAATGGGAAAGCGATCCTGATCATCGTCATGCTTT  | 1626 |
| OsHKT1;3 Genomic DNA | 2221 | TCGGGAGGCTTAAAAACGTTTAAACATGAAGGGTGGAAAGACCTGGAAAGCTTAGATAAAGCG | 2280 |
| OsHKT1;3_FL          | 1627 | TCGGGGGGCTTAAAAACGTTTAAACATGAAGGGTGGAAAGACCTGGAAAGCTTAGATAAAGCG | 1686 |
| OsHKT1;3 Genomic DNA | 2281 | GCCGCGACGGTACCACATAAACCGCCTCAAGAACACCCGAATGGAGTCTCTAAGCTACAT    | 2340 |
| OsHKT1;3_FL          | 1687 | GCCGCGACGGTACCACATAAACCGCCTCAAGAACACCCGAATGGAGTCTCTAAGCTACAT    | 1746 |
| OsHKT1;3 Genomic DNA | 2341 | AATACCAACTTACACTTACAAA                                          | 2362 |
| OsHKT1;3_FL          | 1747 | AATACCAACTTACACTTACAAA                                          | 1768 |

**Supplementary Figure S2.**  
Nucleotide sequence alignment of Nipponbare OsHKT1;3 genomic DNA and full-length cDNA. GENETYX ver. 13 was used for exon-intron analysis.

|             |     |                                                                 |     |
|-------------|-----|-----------------------------------------------------------------|-----|
| OsHKT1;3_FL | 1   | --GGGCCCCCCTCGAGGTCGACGGTATCGATAAGCTTGCTTGTTCTTTTTGCAGAAGCTC    | 58  |
| OsHKT1;3_V1 | 1   | --GGGCCCCCCTCGAGGTCGACGGTATCGATAAGCTTGCTTGTTCTTTTTGCAGAAGCTC    | 58  |
| OsHKT1;3_V2 | 1   | CGGGGCCCCCCTCGAGGTCGACGGTATCGATAAGCTTGCTTGTTCTTTTTGCAGAAGCTC    | 60  |
| OsHKT1;3_V3 | 1   | CGGGGCCCCCCTCGAGGTCGACGGTATCGATAAGCTTGCTTGTTCTTTTTGCAGAAGCTC    | 60  |
| OsHKT1;3_V4 | 1   | --GGGCCCCCCTCGAGGTCGACGGTATCGATAAGCTTGCTTGTTCTTTTTGCAGAAGCTC    | 58  |
| OsHKT1;3_V5 | 1   | --GGGCCCCCCTCGAGGTCGACGGTATCGATAAGCTTGCTTGTTCTTTTTGCAGAAGCTC    | 58  |
| Start codon |     |                                                                 |     |
| OsHKT1;3_FL | 59  | AGAATAAACGCTCAACTTTGGCAGAACCATGAATCATTGTCTTGTA GTATCCACAAAAA    | 118 |
| OsHKT1;3_V1 | 59  | AGAATAAACGCTCAACTTTGGCAGAACCATGAATCATTGTCTTGTA GTATCCACAAAAA    | 118 |
| OsHKT1;3_V2 | 61  | AGAATAAACGCTCAACTTTGGCAGAACCATGAATCATTGTCTTGTA GTATCCACAAAAA    | 120 |
| OsHKT1;3_V3 | 61  | AGAATAAACGCTCAACTTTGGCAGAACCATGAATCATTGTCTTGTA GTATCCACAAAAA    | 120 |
| OsHKT1;3_V4 | 59  | AGAATAAACGCTCAACTTTGGCAGAACCATGAATCATTGTCTTGTA GTATCCACAAAAA    | 118 |
| OsHKT1;3_V5 | 59  | AGAATAAACGCTCAACTTTGGCAGAACCATGAATCATTGTCTTGTA GTATCCACAAAAA    | 118 |
| M1          |     |                                                                 |     |
| OsHKT1;3_FL | 119 | ACTCCAAACTTTCCGCACATTTGCAGCTAGCAA GTTCTCTTCTTTTACCAAATCTGCACA   | 178 |
| OsHKT1;3_V1 | 119 | ACTCCAAACTTTCCGCACATTTGCAGCTAGCAA GTTCTCTTCTTTTACCAAATCTGCACA   | 178 |
| OsHKT1;3_V2 | 121 | ACTCCAAACTTTCCGCACATTTGCAGCTAGCAA GTTCTCTTCTTTTACCAAATCTGCACA   | 180 |
| OsHKT1;3_V3 | 121 | ACTCCAAACTTTCCGCACATTTGCAGCTAGCAA GTTCTCTTCTTTTACCAAATCTGCACA   | 180 |
| OsHKT1;3_V4 | 119 | ACTCCAAACTTTCCGCACATTTGCAGCTAGCAA GTTCTCTTCTTTTACCAAATCTGCACA   | 178 |
| OsHKT1;3_V5 | 119 | ACTCCAAACTTTCCGCACATTTGCAGCTAGCAA GTTCTCTTCTTTTACCAAATCTGCACA   | 178 |
| OsHKT1;3_FL | 179 | GAAGTCTATAAAATACTCCTTCCAGTTCATCTACCAAACAATCCA CTCTTTGTCCATGT    | 238 |
| OsHKT1;3_V1 | 179 | GAAGTCTATAAAATACTCCTTCCAGTTCATCTACCAAACAATCCA CTCTTTGTCCATGT    | 238 |
| OsHKT1;3_V2 | 181 | GAAGTCTATAAAATACTCCTTCCAGTTCATCTACCAAACAATCCA CTCTTTGTCCATGT    | 240 |
| OsHKT1;3_V3 | 181 | GAAGTCTATAAAATACTCCTTCCAGTTCATCTACCAAACAATCCA CTCTTTGTCCATGT    | 240 |
| OsHKT1;3_V4 | 179 | GAAGTCTATAAAATACTCCTTCCAGTTCATCTACCAAACAATCCA CTCTTTGTCCATGT    | 238 |
| OsHKT1;3_V5 | 179 | GAAGTCTATAAAATACTCCTTCCAGTTCATCTACCAAACAATCCA CTCTTTGTCCATGT    | 238 |
| OsHKT1;3_FL | 239 | AGCTTACTTTGCCCTGATCTCCTTTGCTGGATATGGATCTCTAAAGGT CCTCAAGCCACG   | 298 |
| OsHKT1;3_V1 | 239 | AGCTTACTTTGCCCTGATCTCCTTTGCTGGATATGGATCTCTAAAGGT CCTCAAGCCACG   | 298 |
| OsHKT1;3_V2 | 241 | AGCTTACTTTGCCCTGATCTCCTTTGCTGGATATGGATCTCTAAAGGT CCTCAAGCCACG   | 300 |
| OsHKT1;3_V3 | 241 | AGCTTACTTTGCCCTGATCTCCTTTGCTGGATATGGATCTCTAAAGGT CCTCAAGCCACG   | 300 |
| OsHKT1;3_V4 | 239 | AGCTTACTTTGCCCTGATCTCCTTTGCTGGATATGGATCTCTAAAGGT CCTCAAGCCACG   | 298 |
| OsHKT1;3_V5 | 239 | AGCTTACTTTGCCCTGATCTCCTTTGCTGGATATGGATCTCTAAAGGT CCTCAAGCCACG   | 298 |
| OsHKT1;3_FL | 299 | AGACAAAGTCAAATACTCTGAAAGACTTGGACGTGCTATTTACTTCCGTATCTGCATCAAC   | 358 |
| OsHKT1;3_V1 | 299 | AGACAAAGTCAAATACTCTGAAAGACTTGGACGTGCTATTTACTTCCGTATCTGCATCAAC   | 358 |
| OsHKT1;3_V2 | 301 | AGACAAAGTCAAATACTCTGAAAGACTTGGACGTGCTATTTACTTCCGTATCTGCATCAAC   | 360 |
| OsHKT1;3_V3 | 301 | AGACAAAGTCAAATACTCTGAAAGACTTGGACGTGCTATTTACTTCCGTATCTGCATCAAC   | 360 |
| OsHKT1;3_V4 | 299 | AGACAAAGTCAAATACTCTGAAAGACTTGGACGTGCTATTTACTTCCGTATCTGCATCAAC   | 358 |
| OsHKT1;3_V5 | 299 | AGACAAAGTCAAATACTCTGAAAGACTTGGACGTGCTATTTACTTCCGTATCTGCATCAAC   | 358 |
| OsHKT1;3_FL | 359 | TGTTTCAAGCATGGCTACTGTTGAAATGGAGGATTTCTCAAGCGCTCAA CTCTGGGTTTT   | 418 |
| OsHKT1;3_V1 | 359 | TGTTTCAAGCATGGCTACTGTTGAAATGGAGGATTTCTCAAGCGCTCAA CTCTGGGTTTT   | 418 |
| OsHKT1;3_V2 | 361 | TGTTTCAAGCATGGCTACTGTTGAAATGGAGGATTTCTCAAGCGCTCAA CTCTGGGTTTT   | 420 |
| OsHKT1;3_V3 | 361 | TGTTTCAAGCATGGCTACTGTTGAAATGGAGGATTTCTCAAGCGCTCAA CTCTGGGTTTT   | 420 |
| OsHKT1;3_V4 | 359 | TGTTTCAAGCATGGCTACTGTTGAAATGGAGGATTTCTCAAGCGCTCAA CTCTGGGTTTT   | 418 |
| OsHKT1;3_V5 | 359 | TGTTTCAAGCATGGCTACTGTTGAAATGGAGGATTTCTCAAGCGCTCAA CTCTGGGTTTT   | 418 |
| M2          |     |                                                                 |     |
| OsHKT1;3_FL | 419 | GACTATTTTAAATGCTGATTGGTG GTGAGGTATTCAC TTCAATGCTTGGCATTCACTTTAT | 478 |
| OsHKT1;3_V1 | 419 | G-----                                                          | 419 |
| OsHKT1;3_V2 | 421 | GACTATTTTAAATGCTGATTGGTG GTGAGATACT-----                        | 453 |
| OsHKT1;3_V3 | 421 | GACTATTTTAAATGCTGATTGGTG GT-----                                | 445 |
| OsHKT1;3_V4 | 419 | GACTATTTTAAATGCTGATTGGTG GTAGGTA---TCTCCCTGGTTACACTTCGTTTT--    | 472 |
| OsHKT1;3_V5 | 419 | GACTATTTTAAATGCTGATTGGTG GTAGGTT-----                           | 448 |
| OsHKT1;3_FL | 479 | GAGAGCCGAATTTGGTACAAAAGAGTCAGTCAGCACAAAGGGATCACTCACCTTGCA TTGA  | 538 |
| OsHKT1;3_V1 | 419 | -----                                                           | 419 |
| OsHKT1;3_V2 | 453 | -----                                                           | 453 |
| OsHKT1;3_V3 | 445 | -----                                                           | 445 |
| OsHKT1;3_V4 | 473 | --TACCCAGA-----                                                 | 480 |
| OsHKT1;3_V5 | 448 | -----                                                           | 448 |
| OsHKT1;3_FL | 539 | TATTGAGTCTATTACTTCCACAAAATTTGGTCCCAGCACCCAGGGCACAAAAGTTACAGT    | 598 |
| OsHKT1;3_V1 | 419 | -----                                                           | 419 |
| OsHKT1;3_V2 | 453 | -----                                                           | 453 |
| OsHKT1;3_V3 | 445 | -----                                                           | 445 |
| OsHKT1;3_V4 | 480 | -----                                                           | 480 |
| OsHKT1;3_V5 | 448 | -----                                                           | 448 |
| OsHKT1;3_FL | 599 | TTCA TTTTCTGAACTCCGCATGGAAAA TGGAGGACATGTAGAGCCCAAGACGATTAAATT  | 658 |
| OsHKT1;3_V1 | 419 | -----                                                           | 419 |
| OsHKT1;3_V2 | 453 | -----                                                           | 453 |
| OsHKT1;3_V3 | 445 | -----                                                           | 445 |
| OsHKT1;3_V4 | 480 | -----                                                           | 480 |
| OsHKT1;3_V5 | 448 | -----                                                           | 448 |

M3

|             |     |                                                              |     |
|-------------|-----|--------------------------------------------------------------|-----|
| OsHKT1;3_FL | 659 | TTTAGGTTTTGTAGTGATGGGATATCTTCTAATAACAAACTTAGGCGGCTCCCTACTTAT | 718 |
| OsHKT1;3_V1 | 419 | -----                                                        | 419 |
| OsHKT1;3_V2 | 453 | -----                                                        | 453 |
| OsHKT1;3_V3 | 445 | -----                                                        | 445 |
| OsHKT1;3_V4 | 480 | -----                                                        | 480 |
| OsHKT1;3_V5 | 448 | -----                                                        | 448 |
| OsHKT1;3_FL | 719 | TTACCTCTACCTTAACCTGGTACCAAGTGCACATAAAATTCTAAAGAGAAAAGGCATTGG | 778 |
| OsHKT1;3_V1 | 419 | -----                                                        | 419 |
| OsHKT1;3_V2 | 453 | -----                                                        | 453 |
| OsHKT1;3_V3 | 445 | -----                                                        | 445 |
| OsHKT1;3_V4 | 480 | -----                                                        | 480 |
| OsHKT1;3_V5 | 448 | -----                                                        | 448 |
| OsHKT1;3_FL | 779 | GATCATCGTATTCTCAGTATTTACAGCCATCTCCTCAGTTGGAAATTGTGGCTTCACTCC | 838 |
| OsHKT1;3_V1 | 419 | -----                                                        | 419 |
| OsHKT1;3_V2 | 453 | -----                                                        | 453 |
| OsHKT1;3_V3 | 445 | -----                                                        | 445 |
| OsHKT1;3_V4 | 480 | -----                                                        | 480 |
| OsHKT1;3_V5 | 448 | -----                                                        | 448 |

M4

|             |     |                                                               |      |
|-------------|-----|---------------------------------------------------------------|------|
| OsHKT1;3_FL | 839 | AGTAAATGAGAAATATGATTATCTTTCAGAAGAACTCCATTCTTCTATTGCTAATTCTTCC | 898  |
| OsHKT1;3_V1 | 420 | -----ACTATTTTAAATGCTGATTGGTGG                                 | 442  |
| OsHKT1;3_V2 | 453 | -----                                                         | 453  |
| OsHKT1;3_V3 | 445 | -----                                                         | 445  |
| OsHKT1;3_V4 | 480 | -----                                                         | 480  |
| OsHKT1;3_V5 | 448 | -----                                                         | 448  |
| OsHKT1;3_FL | 899 | TCAGATACTAGCAGGAAATACATTATTTGCACCATGCTTGAGATTAATGGTGTGGTCACT  | 958  |
| OsHKT1;3_V1 | 443 | TGAGATACTAGCAGGAAATACATTATTTGCACCATGCTTGAGATTAATGGTGTGGTCACT  | 502  |
| OsHKT1;3_V2 | 454 | -----AGCAGGAAATACATTATTTGCACCATGCTTGAGATTAATGGTGTGGTCACT      | 504  |
| OsHKT1;3_V3 | 445 | -----                                                         | 445  |
| OsHKT1;3_V4 | 480 | -----                                                         | 480  |
| OsHKT1;3_V5 | 448 | -----                                                         | 448  |
| OsHKT1;3_FL | 959 | TGAGAAGATTACCGGAAAAAAGGATTGTCTGTTACATTCTTGAATATCCAAAGGCCATTGG | 1018 |
| OsHKT1;3_V1 | 503 | TGAGAAGGTTACCGGAAAAAAGGATTGTCTGTTACATTCTTGAATATCCAAAGGCCATTGG | 562  |
| OsHKT1;3_V2 | 505 | TGAGAAGATTACCGGAAAAAAGGATTGTCTGTTACATTCTTGAATATCCAAAGGCCATTGG | 564  |
| OsHKT1;3_V3 | 445 | -----                                                         | 445  |
| OsHKT1;3_V4 | 480 | -----                                                         | 480  |
| OsHKT1;3_V5 | 448 | -----                                                         | 448  |

M5

|             |      |                                                               |      |
|-------------|------|---------------------------------------------------------------|------|
| OsHKT1;3_FL | 1019 | ATATAAACATCTTATGAGTACCAGGGAAAAGTGTTTATTTGACTTTAACAGTTGTGAGCTT | 1078 |
| OsHKT1;3_V1 | 563  | ATATAAACATCTTATGAGTACCAGGGAAAAGTGTTTATTTGACTTTAACAGTTGTGAGCTT | 622  |
| OsHKT1;3_V2 | 565  | ATATAAACATCTTATGAGTACCAGGGAAAAGTGTTTATTTGACTTTAACAGTTGTGAGCTT | 624  |
| OsHKT1;3_V3 | 445  | -----                                                         | 445  |
| OsHKT1;3_V4 | 480  | -----                                                         | 480  |
| OsHKT1;3_V5 | 448  | -----                                                         | 448  |
| OsHKT1;3_FL | 1079 | GATCATTCTGCAAACCGTATTGTTCCCTCTCTTTGGAGTGGAGCTCGGTAGCTTTGGATGG | 1138 |
| OsHKT1;3_V1 | 623  | GATCATTCTGCAAACCGTATTGTTCCCTCTCTTTGGAGTGGAGCTCGGTAGCTTTGGATGG | 682  |
| OsHKT1;3_V2 | 625  | GATCATTCTGCAAACCGTATTGTTCCCTCTCTTTGGAGTGGAGCTCGGTAGCTTTGGATGG | 684  |
| OsHKT1;3_V3 | 445  | -----                                                         | 445  |
| OsHKT1;3_V4 | 480  | -----                                                         | 480  |
| OsHKT1;3_V5 | 448  | -----                                                         | 448  |
| OsHKT1;3_FL | 1139 | AATGAGCAACTATCAAAAGATAGTATCCGCTCTATTTCAGTCGGTCAATGCTAGGCGTGC  | 1198 |
| OsHKT1;3_V1 | 683  | AATGAGCAACTATCAAAAGATAGTATCCGCTCTATTTCAGTCGGTCAATGCTAGGCATGC  | 742  |
| OsHKT1;3_V2 | 685  | AATGAGCAACTATCAAAAGATAGTATCCGCTCTATTTCAGTCGGTCAATGCTAGGCATGC  | 744  |
| OsHKT1;3_V3 | 445  | -----                                                         | 445  |
| OsHKT1;3_V4 | 480  | -----                                                         | 480  |
| OsHKT1;3_V5 | 448  | -----                                                         | 448  |

M6

|             |      |                                                              |      |
|-------------|------|--------------------------------------------------------------|------|
| OsHKT1;3_FL | 1199 | AGGTGAATCTGTTACAGATCTGTCAAACCTCTCTTCAGCAATCCTAGTCCTATACACCAT | 1258 |
| OsHKT1;3_V1 | 743  | AGGTGAATCTGTTACAGATCTGTCAAACCTCTCTTCAGCAATCCTAGTCCTATACACCAT | 802  |
| OsHKT1;3_V2 | 745  | AGGTGAATCTGTTACAGATCTGTCAAACCTCTCTTCAGCAATCCTAGTCCTATACACCAT | 804  |
| OsHKT1;3_V3 | 445  | -----                                                        | 445  |
| OsHKT1;3_V4 | 480  | -----                                                        | 480  |
| OsHKT1;3_V5 | 448  | -----                                                        | 448  |
| Stop codon  |      |                                                              |      |
| OsHKT1;3_FL | 1259 | CATGATGTATCTCCCTGGTTACACTTCGTTTTTACCCAGACATGATGGTGAGGATTCTAA | 1318 |
| OsHKT1;3_V1 | 803  | CATGATGTATCTCCCTGGTTACACTTCGTTTTTACCCAGACATGATGGTGAGGATTCTAA | 862  |
| OsHKT1;3_V2 | 805  | CATGATGTATCTCCCTGGTTACGCTTCGTTTTTACCCAGACATGATGAACGGGACTCGAT | 864  |
| OsHKT1;3_V3 | 446  | -----ATCTCCCTGGTTGCACTTCGTTTTTACCCAGACATGATGGTGAGGATTCTAA    | 497  |
| OsHKT1;3_V4 | 480  | -----                                                        | 480  |
| OsHKT1;3_V5 | 449  | -----ATCTCCCTGGTTACACTTCGTTTTTACCCAGACATGATGGTGAGGATTCTAA    | 500  |

|             |      | Stop codon                                                     |      | M7 |
|-------------|------|----------------------------------------------------------------|------|----|
| OsHKT1;3_FL | 1319 | GACCGAGAAGATAAAACAAAAGAAAAGGGCTATTGGAGAACTGGATCTTCTCACATATGTC  | 1378 |    |
| OsHKT1;3_V1 | 863  | GACCGAGAAGATAGACAAAAGAAAAGGGCTATTGGGGAAC TGGATCTTCTCACATATGTC  | 922  |    |
| OsHKT1;3_V2 | 865  | GGC-----                                                       | 867  |    |
| OsHKT1;3_V3 | 498  | GACCGAGAAGA TAAACAAAAGGAAAAGGGCTATTGGAGAACTGGATCTTCCCACATATGTC | 557  |    |
| OsHKT1;3_V4 | 480  | -----                                                          | 480  |    |
| OsHKT1;3_V5 | 501  | GACCGAGAAGATAAAACAAAAGAAAAGGGCTATTGGAGAACTGGATCTTCTCACATATGTC  | 560  |    |
|             |      | Stop codon                                                     |      |    |
| OsHKT1;3_FL | 1379 | TTATTTGGCTATCTTTGTAATGCTAATTTGCATCACAGAACGGGACTCGATGGCTGCAGA   | 1438 |    |
| OsHKT1;3_V1 | 923  | TTATTTGGCTATCTTTGTAATGCTAATTTGCATTACAGAACGGGACTCGATGGCTACCGA   | 982  |    |
| OsHKT1;3_V2 | 868  | -----TACAGA                                                    | 873  |    |
| OsHKT1;3_V3 | 558  | TTATTTGGCTATCTTTGTAATGCTAATTTGCATCACAGAACGGGACTCGATGGCTACAGA   | 617  |    |
| OsHKT1;3_V4 | 481  | -----CATGATGAACGGGACTCGATGGCTACAGA                             | 509  |    |
| OsHKT1;3_V5 | 561  | TTATTTGGCTATCTTTGTAATGCTAATTTGCATCACAGAACGGGACTCGATGGCTACAGA   | 620  |    |
| OsHKT1;3_FL | 1439 | TCCACTTAATTTCAATGTTTTCAGCATATTGTTTGAAGTCGTCAGTGCATATGGAAATGT   | 1498 |    |
| OsHKT1;3_V1 | 983  | TCCACTTAATTTCAATGTTTTCAGCATATTGTTTGAAGTTGTCAGTGCATATGGAAATGT   | 1042 |    |
| OsHKT1;3_V2 | 874  | TCCACTTAATTTCAATGTTTTCAGCATATTGTTTGAAGTCGTCAGTGCATATGGAAATGT   | 933  |    |
| OsHKT1;3_V3 | 618  | TCCACTTAATTTCAATGTTTTCAGCATATTGTTTGAAGTCGTCAGTGCATATGGAAATGT   | 677  |    |
| OsHKT1;3_V4 | 510  | TCCACTTAATTTCAATGTTTTCAGCATATTGTTTGAAGTCGTCAGTGCATATGGAAATGT   | 569  |    |
| OsHKT1;3_V5 | 621  | TCCACTTAAC TCAATGTTTTCAGCATATTGTTTGAAGTCGTCAGTGCATATGGAAATGT   | 680  |    |
| OsHKT1;3_FL | 1499 | GGGGTTCTCGGTTGGCTACAGCTGCAAGAGGCTACTGAACCATGATGCACGCTGCAAGGA   | 1558 |    |
| OsHKT1;3_V1 | 1043 | GGGGTTCTCGGTTGGCTACAGCTGCAAGAGGCTACTGAACCATGATGCACGCTGCAAGGA   | 1102 |    |
| OsHKT1;3_V2 | 934  | GGGGTTCTCGGTTGGCTACAGCTGCAAGAGGCTACTGAACCATGATGCACGCTGCAAGGA   | 993  |    |
| OsHKT1;3_V3 | 678  | GGGGTTCTCGGTTGGCTACAGCTGCAAGAGGCTACTGAACCATGATGCACGCTGCAAGGA   | 737  |    |
| OsHKT1;3_V4 | 570  | GGGGTTCTCGGTTGGCTACAGCTGCAAGAGGCTACTGAACCATGATGCACGCTGCAAGGA   | 629  |    |
| OsHKT1;3_V5 | 681  | GGGGTTCTCGGTTGGCTACAGCTGCAAGAGGCTACTGAACCATGATGCACGCTGCAAGGA   | 740  |    |
|             |      | M8                                                             |      |    |
| OsHKT1;3_FL | 1559 | TGCCTCGTACGGGTTTGCGGGGAAAATGGAGCGACAATGGGAAAGCGATCCTGATCATCGT  | 1618 |    |
| OsHKT1;3_V1 | 1103 | TGCCTCGTACGGGTTTGCGGGGAAAATGGATCGACAATGGGAAAGCGATCCTGATCATCGT  | 1162 |    |
| OsHKT1;3_V2 | 994  | TGCCTCGTACGGGTTTGCGGGGAAAATGGAGCGACAATGGGAAAGCGATCCTGATCATCGT  | 1053 |    |
| OsHKT1;3_V3 | 738  | TGCCTCGTACGGGTTTGCGGGGAAAATGGAGCGACAATGGGAAAGCGATCCTGATCATCGT  | 797  |    |
| OsHKT1;3_V4 | 630  | TGCCTCGTACGGGTTTGCGGGGAAAATGGAGCGACAATGGGAAAGCGATCCTGATCATCGT  | 689  |    |
| OsHKT1;3_V5 | 741  | TGCCTCGTACGGGTTTGCGGGGAAAATGGAGCGACAATGGGAAAGCGATCCTGATCATCGT  | 800  |    |
| OsHKT1;3_FL | 1619 | CATGCTTTTCGGGGGGCTTAAACCGTTTAACATGAAGGGTGGAAGAGCCTGGAAGCCTTAG  | 1678 |    |
| OsHKT1;3_V1 | 1163 | CATGCTTTTCGGGAGGCTTAAACCGTTTAACATGAAGGGTGGAAGAGCCTGGAAGCCTTAG  | 1222 |    |
| OsHKT1;3_V2 | 1054 | CATGCTTTTCGGGAGGCTTAAACCGTTTAACATGAAGGGTGGAAGAGCCTGGAAGCCTTAG  | 1113 |    |
| OsHKT1;3_V3 | 798  | CATGCTTTTCGGGAGGCTTAAACCGTTTAACATGAAGGGTGGAAGAGCCTGGAAGCCTTAG  | 857  |    |
| OsHKT1;3_V4 | 690  | CATGCTTTTCGGGAGGCTTAAACCGTTTAACATGAAGGGTGGAAGAGCCTGGAAGCCTTAG  | 749  |    |
| OsHKT1;3_V5 | 801  | CATGCTTTTCGGGAGGCTTAAACCGTTTAACATGAAGGGTGGAAGAGCCTGGAAGCCTTAG  | 860  |    |
|             |      | Stop codon                                                     |      |    |
| OsHKT1;3_FL | 1679 | ATAAAGCGGCCGCGACGGTACCAC TAAACAGCCTCAAGAACACCCGAATGGAGTCTCTA   | 1738 |    |
| OsHKT1;3_V1 | 1223 | ATAAAGCGGCCGCGACGGTACCAC TAAACAGCCTCAAGAACACCCGAATGGAGTCTCTA   | 1282 |    |
| OsHKT1;3_V2 | 1114 | ATAAAGCGGCCGCGACGGTACCAC TAAACAGCCTCAAGAACACCCGAATGGAGTCTCTA   | 1173 |    |
| OsHKT1;3_V3 | 858  | ATAAAGCGGCCGCGACGGTACCAC TAAACAGCCTCAAGAACACCCGAATGGAGTCTCTA   | 917  |    |
| OsHKT1;3_V4 | 750  | ATAAAGCGGCCGCGACGGTACCAC TAAACAGCCTCAAGAACACCCGAATGGAGTCTCTA   | 809  |    |
| OsHKT1;3_V5 | 861  | ATAAAGCGGCCGCGACGGTACCAC TAAACAGCCTCAAGAACACCCGAATGGAGTCTCTA   | 920  |    |
| OsHKT1;3_FL | 1739 | AGCTACATAATACCAACTTACACTT-ACAAA-----                           | 1768 |    |
| OsHKT1;3_V1 | 1283 | AGCTACATAATACCAACTTACACTT-ACAAA-----                           | 1312 |    |
| OsHKT1;3_V2 | 1174 | AGCTACATAATACCAACTTACACTT-ACAAAATG-----                        | 1206 |    |
| OsHKT1;3_V3 | 918  | AGCTACATAATACCAACTTACACTT-TACAAATGTTGTCCCC-----                | 958  |    |
| OsHKT1;3_V4 | 810  | AGCTACATAATACCAACTTACACTTTACAAAATGTTGTCCCCCAAAATGTAGCCATTTCGT  | 869  |    |
| OsHKT1;3_V5 | 921  | AGCTACATAATACCAACTTACACTT-TACAAATGTTGTCCCC--AAATGTAGCCATTTCGT  | 977  |    |
| OsHKT1;3_FL | 1768 | -----                                                          | 1768 |    |
| OsHKT1;3_V1 | 1312 | -----                                                          | 1312 |    |
| OsHKT1;3_V2 | 1206 | -----                                                          | 1206 |    |
| OsHKT1;3_V3 | 958  | -----                                                          | 958  |    |
| OsHKT1;3_V4 | 870  | ATCTGCTCCTAATAAAAAGAAAGTTTCTTC-----                            | 899  |    |
| OsHKT1;3_V5 | 978  | ATCTGCTC-TAATAAAA-GAAAGTT-CTTCCATTCT                           | 1010 |    |

**Supplementary Figure S3.**  
Nucleotide sequence alignment of OsHKT1;3\_FL and its five-variant using GENETYX ver. 13. Presumed membrane-spanning regions of OsHKT1;1\_FL, and positions of start and stop codon for the full-length and variants are indicated.



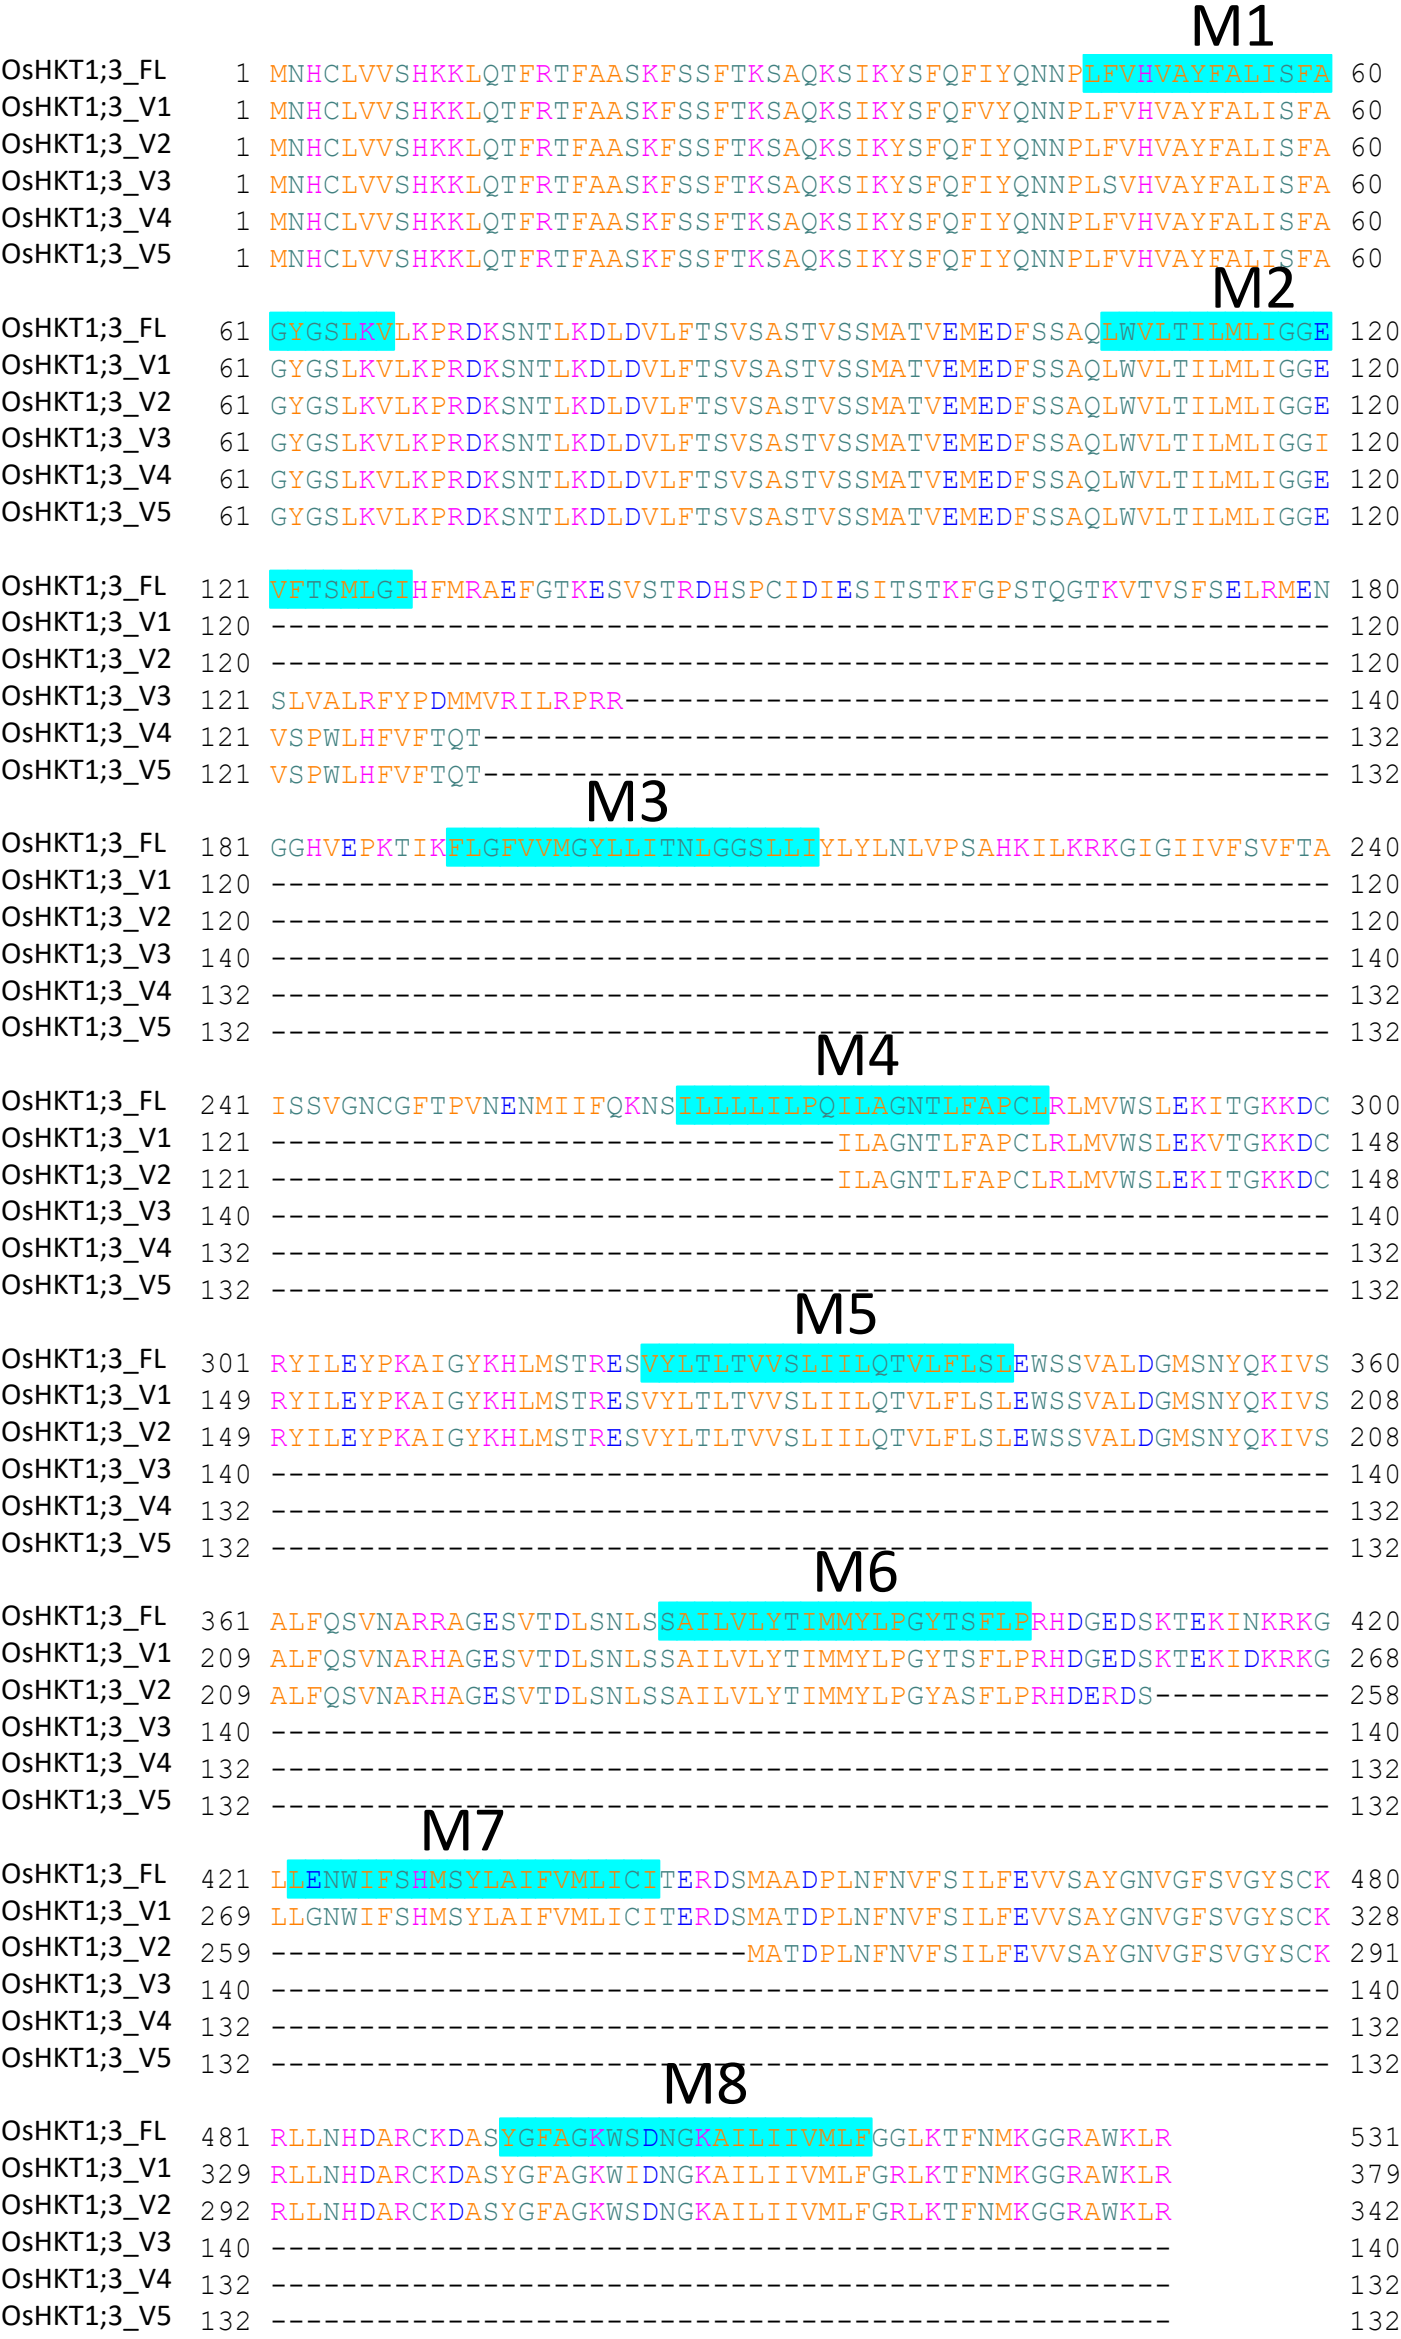

Supplementary Figure S4.

Protein sequence alignment of OsHKT1;3\_FL and its five variant using GENETYXver.13. Presumed membrane-spanning regions of OsHKT1;3\_FL and its five variants are indicated.

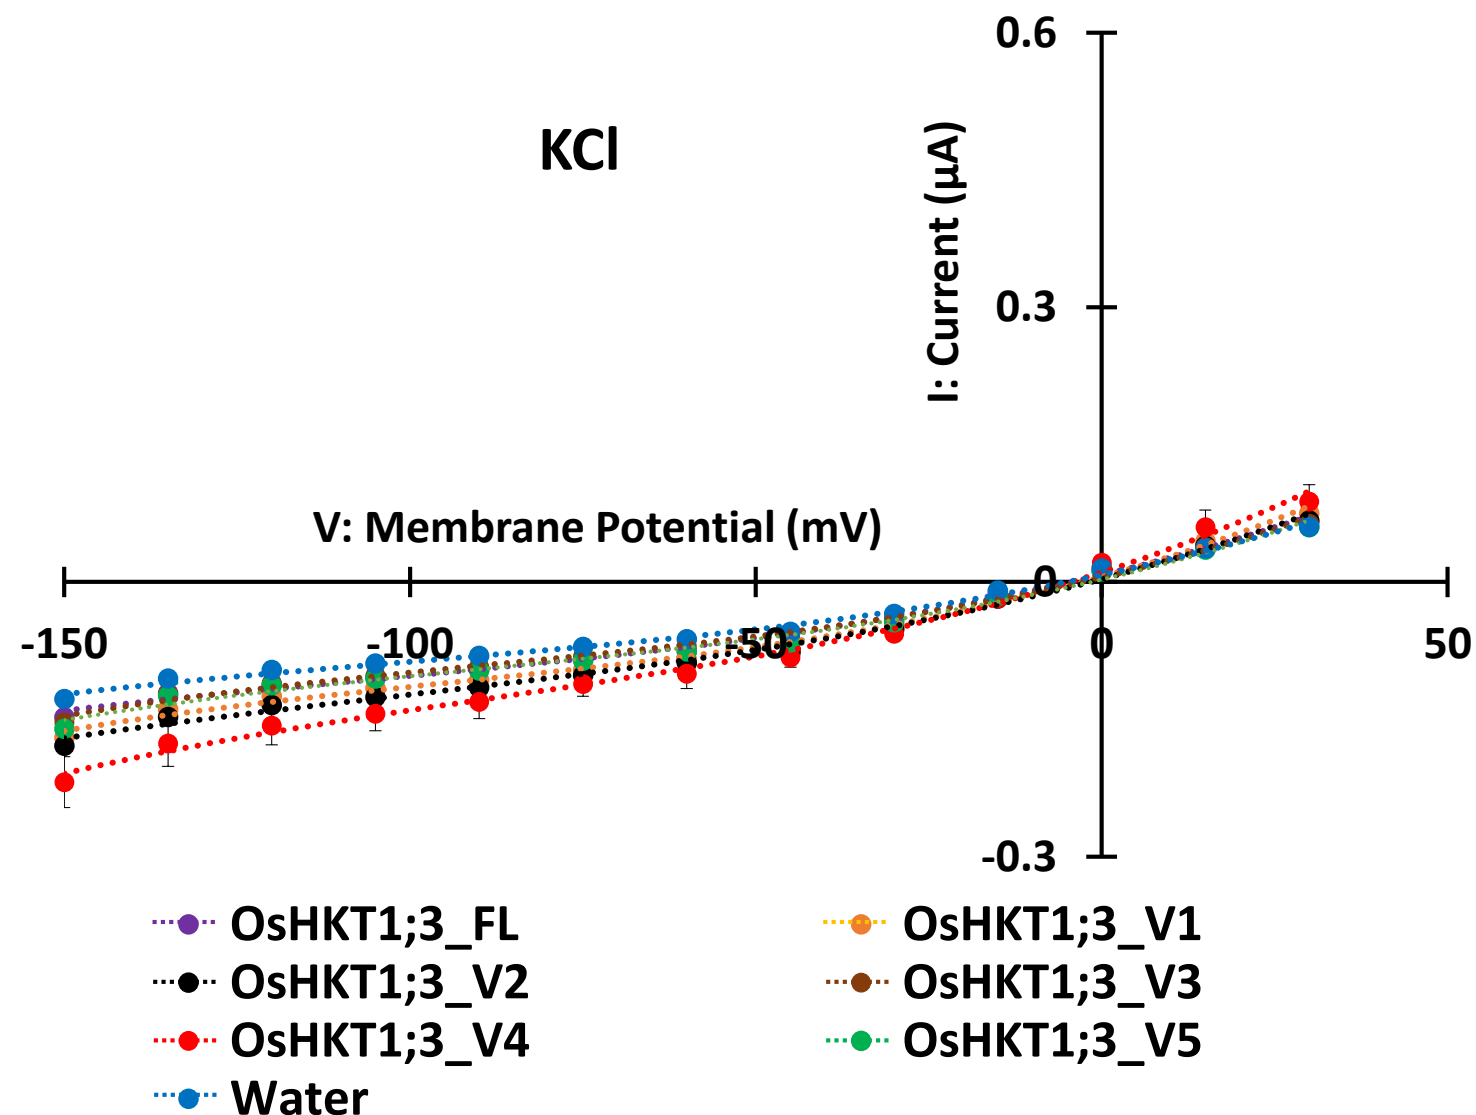

### Supplementary Figure S5.

Current–voltage relationships from oocytes expressing OsHKT1;3\_FL, \_V1, \_V2, \_V3, \_V4, \_V5, and water-injection control in 96 mM KCl external solution. External solutions contain, as background elements, 1.8 mM  $\text{CaCl}_2$ , 1.8 mM  $\text{MgCl}_2$ , 1.8 mM mannitol, and 10 mM HEPES (pH 7.5 with Tris). Water was injected as a negative control. Data are means  $\pm$  SE,  $n = 8$ –10. Regression analysis also performed with polynomial approximation (degree 3).

A)

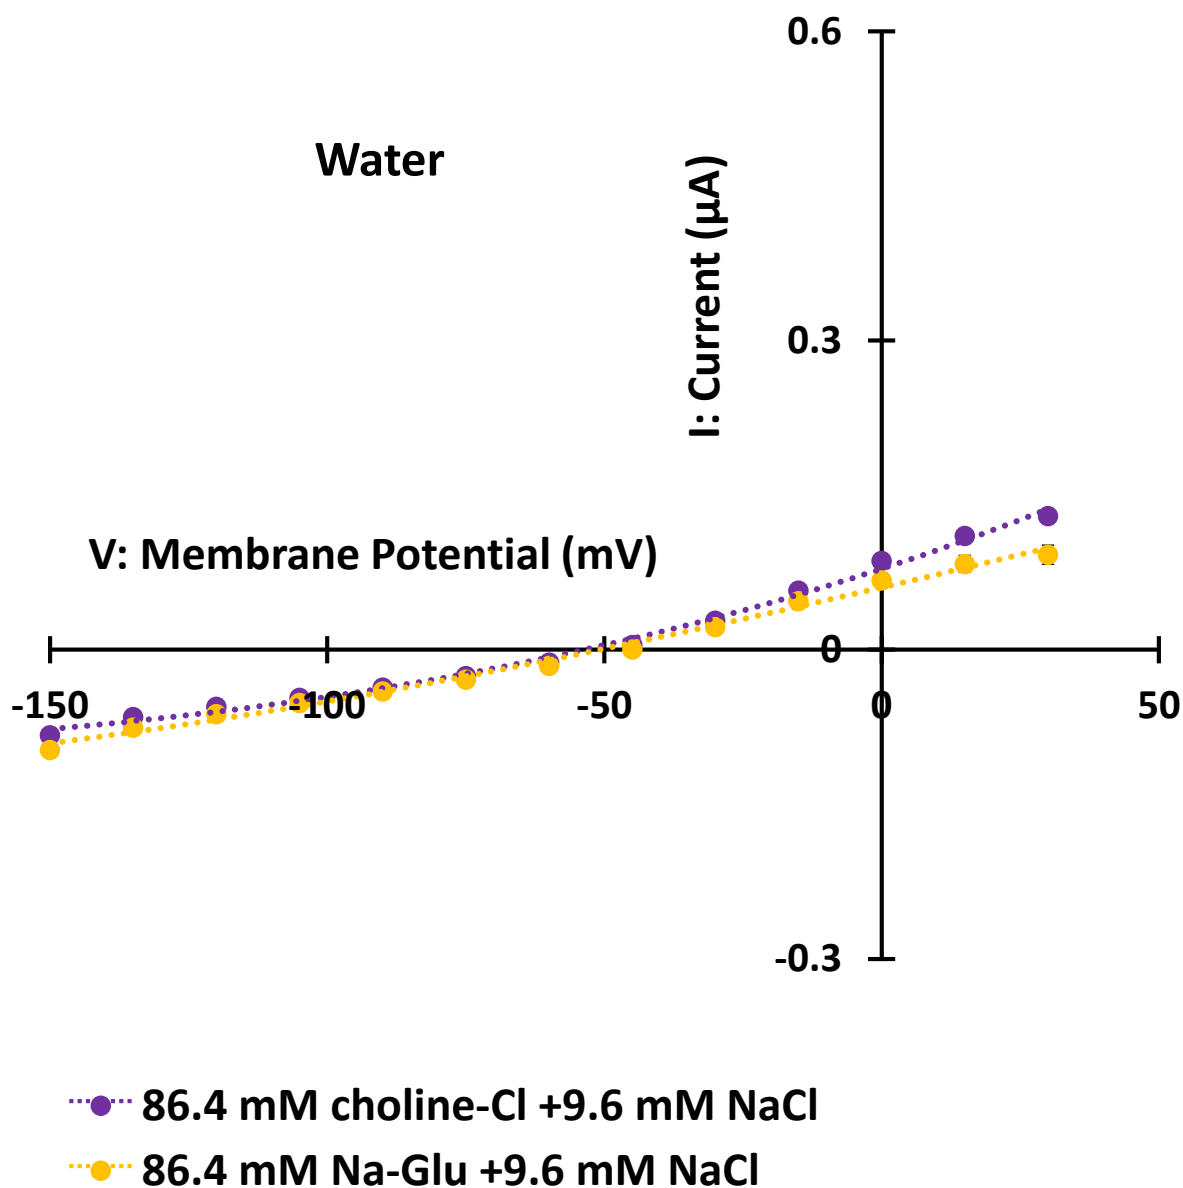

B)

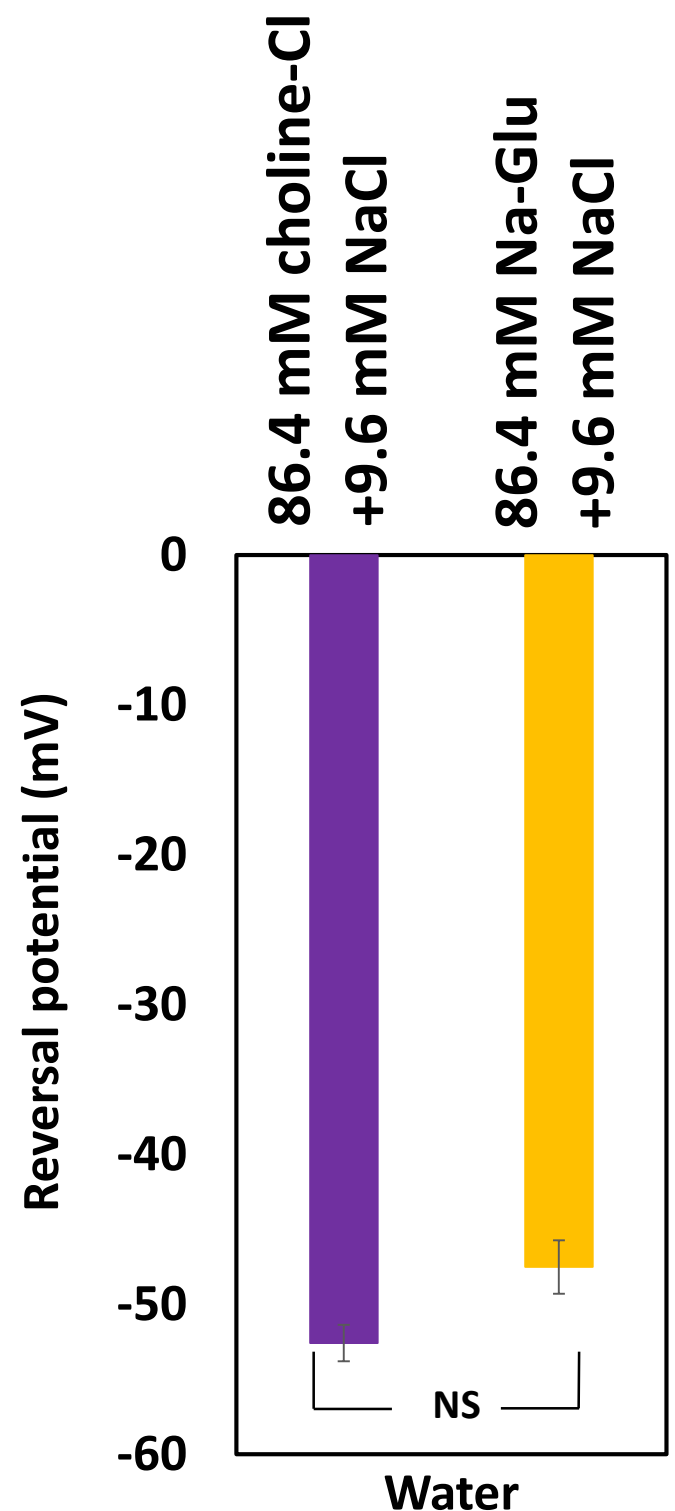

### Supplementary Figure S6.

Current–voltage relationships from oocytes expressing water-injected negative control in 86.4 mM choline Cl + 8.6 mM NaCl external solution and 86.4 mM Na-gluconate + 8.6 mM NaCl external solution (A); Reversal potential shift analysis by changing external Na concentration from 96 mM to 9.6 mM (B). External solutions contain, as background elements, 1.8 mM  $\text{CaCl}_2$ , 1.8 mM  $\text{MgCl}_2$ , 1.8 mM mannitol, and 10 mM HEPES (pH 7.5 with Tris). Water was injected as a negative control. Data are means  $\pm$  SE,  $n = 5$ , Two independent experiments were performed, and similar results were obtained. Regression analysis also performed with polynomial approximation (degree 3). NS indicates data showing no significant difference ( $p < 0.05$ ) detected.
